# Supplementary material for: A Framework for Assessing Social- and Location-Based Transmission Risk as a Heuristic for Individual Decision-Making
Source: Preprints.org preprint supplement (doi:10.20944/preprints202005.0391.v3), 2021-01-12
Supplement: Supplementary file 1 [file supplementary]

## Sheet: Household 1
Household members	Individual Risk Level	Vaccinated	% risk	Location Risk Level	% risk	Ascertainment Rate	Per Capita Cases	Location Prevalance	Totals
1	Level 1	No	0	Level 2	0.02	0.5	0.0027898	0.0055796	Household-social risk Cj
2	Level 1	No	0						0.33
3	Level 1	No	0
4	Level 3	No	0.33						Location-based risk, Lj
			0						0.000111592
			0
			0						Total household-based location risk, Tij
			0						3.68254e-05
Levels	Individual							Location
Risk level 1	Quarantine with no contact except within the household.				Strict stay at home, enough testing, contact tracing, quarantine of all contacts and suspected cases.
0	No exposure
Risk level 2	Stay-at-home with essential contact only, remote workplace				Stay-at-home with essential contact only, remote workplace/schools, essential businesses with strict social distancing and disinfecting measures
0.02	Low exposure, low risk - 98% safety on contact, one contact/day
Risk level 3	Essential worker in an environment practicing strict social distancing measures or in shared housing practicing social distancing measures				Business open but all practicing social distancing or predominately stay at home with a non-negligible percent of the population not social distancing
0.33	High/consistent exposure, but of low risk - 98% safety on contact, 20 contacts/day
Risk level 4	Practicing intermittent social distancing				Only partial practicing of social distancing
0.75	Low - medium exposure, but of high risk - 50% safety on contact, 2 contacts/day
Risk level 5	Essential worker in an environment practicing no social distancing measures or not practicing social distancing				Business as usual - Not practicing social distancing and no testing/quarantining
1	Consistent exposure, high risk - 50% safety on contact, 20 contacts/day

## Sheet: Household 2
Household members	Individual Risk Level	Vaccinated	% risk	Location Risk Level	% risk	Ascertainment Rate	Per Capita Cases	Location Prevalance	Totals
1	Level 1	No	0	Level 4	0.75	0.5	0.000182445	0.00036489	Household-social risk Cj
2	Level 1	No	0						0.3434
3	Level 2	No	0.02
4	Level 3	No	0.33						Location-based risk, Lj
			0						0.000273668
			0
			0						Total household-based location risk, Tij
			0						9.39775e-05
Levels	Individual							Location
Risk level 1	Quarantine with no contact except within the household.				Strict stay at home, enough testing, contact tracing, quarantine of all contacts and suspected cases.
0	No exposure
Risk level 2	Stay-at-home with essential contact only, remote workplace				Stay-at-home with essential contact only, remote workplace/schools, essential businesses with strict social distancing and disinfecting measures
0.02	Low exposure, low risk - 98% safety on contact, one contact/day
Risk level 3	Essential worker in an environment practicing strict social distancing measures or in shared housing practicing social distancing measures				Business open but all practicing social distancing or predominately stay at home with a non-negligible percent of the population not social distancing
0.33	High/consistent exposure, but of low risk - 98% safety on contact, 20 contacts/day
Risk level 4	Practicing intermittent social distancing				Only partial practicing of social distancing
0.75	Low - medium exposure, but of high risk - 50% safety on contact, 2 contacts/day
Risk level 5	Essential worker in an environment practicing no social distancing measures or not practicing social distancing				Business as usual - Not practicing social distancing and no testing/quarantining
1	Consistent exposure, high risk - 50% safety on contact, 20 contacts/day

## Sheet: Household 3
Household members	Individual Risk Level	Vaccinated	% risk	Location Risk Level	% risk	Ascertainment Rate	Per Capita Cases	Location Prevalance	Totals
1	Level 1	No	0	Level 4	0.75	0.5	0.000182445	0.00036489	Household-social risk Cj
2	Level 2	No	0.02						0.02
			0
			0						Location-based risk, Lj
			0						0.000273668
			0
			0						Total household-based location risk, Tij
			0						5.47335e-06
Levels	Individual							Location
Risk level 1	Quarantine with no contact except within the household.				Strict stay at home, enough testing, contact tracing, quarantine of all contacts and suspected cases.
0	No exposure
Risk level 2	Stay-at-home with essential contact only, remote workplace				Stay-at-home with essential contact only, remote workplace/schools, essential businesses with strict social distancing and disinfecting measures
0.02	Low exposure, low risk - 98% safety on contact, one contact/day
Risk level 3	Essential worker in an environment practicing strict social distancing measures or in shared housing practicing social distancing measures				Business open but all practicing social distancing or predominately stay at home with a non-negligible percent of the population not social distancing
0.33	High/consistent exposure, but of low risk - 98% safety on contact, 20 contacts/day
Risk level 4	Practicing intermittent social distancing				Only partial practicing of social distancing
0.75	Low - medium exposure, but of high risk - 50% safety on contact, 2 contacts/day
Risk level 5	Essential worker in an environment practicing no social distancing measures or not practicing social distancing				Business as usual - Not practicing social distancing and no testing/quarantining
1	Consistent exposure, high risk - 50% safety on contact, 20 contacts/day

## Sheet: Household 4
Household members	Individual Risk Level, Cij	Vaccinated	% risk	Location Risk Level	% risk	Ascertainment Rate	Per Capita Cases	Location Prevalance	Totals
1	Level 2	No	0.02	Level 3	0.33	0.5	0.003035	0.00607	Household-social risk Cj
2	Level 3	No	0.33						0.83585
3	Level 4	No	0.75
			0						Location-based risk, Lj
			0						0.0020031
			0
			0						Total household-based location risk, Tij
			0						0.00167429
Levels	Individual							Location
Risk level 1	Quarantine with no contact except within the household.				Strict stay at home, enough testing, contact tracing, quarantine of all contacts and suspected cases.
0	No exposure
Risk level 2	Stay-at-home with essential contact only, remote workplace				Stay-at-home with essential contact only, remote workplace/schools, essential businesses with strict social distancing and disinfecting measures
0.02	Low exposure, low risk - 98% safety on contact, one contact/day
Risk level 3	Essential worker in an environment practicing strict social distancing measures or in shared housing practicing social distancing measures				Business open but all practicing social distancing or predominately stay at home with a non-negligible percent of the population not social distancing
0.33	High/consistent exposure, but of low risk - 98% safety on contact, 20 contacts/day
Risk level 4	Practicing intermittent social distancing				Only partial practicing of social distancing
0.75	Low - medium exposure, but of high risk - 50% safety on contact, 2 contacts/day
Risk level 5	Essential worker in an environment practicing no social distancing measures or not practicing social distancing				Business as usual - Not practicing social distancing and no testing/quarantining
1	Consistent exposure, high risk - 50% safety on contact, 20 contacts/day

## Sheet: Pooling Households
Households	T_h household risk	Include in limited pool?	Value	Risk multiplier of full pool	Risk multiplier of limited pool	Totals
1	3.68254e-05	Yes	3.68254e-05	49.16	1.14862	Full pool risk
2	9.39775e-05	No	0	19.2635	1	0.00181034
3	5.47335e-06	Yes	5.47335e-06	330.754	7.72808
4	0.00167429	No	0	1.08125	1	Limited pool risk
	0	No	0	1	1	4.22985e-05
	0	No	0	1	1
	0	No	0	1	1	Relative risk reduction of limiting pool
	0	No	0	1	1	0.976635

## Sheet: Read Me
Author Dr. Carrie Diaz Eaton, Bates College - Use with attribution
This Excel file includes a 4 sheets for each household example in the paper as well as a pooling household calculator
To add more households, go to the triangle by the household sheet name > duplicate.
Prevalance is caculated as per capita active cases * (1/ascertainment rate). Make sure to consistently define your location - either as town, zip code or county
Number of active cases in location		Number of people in location		Reported per Capita Cases
823		295003		0.027898
The default ascertainment rate used is 0.5, but can be edited. An ascertainment rate of 1 is an ideal system. In early 2020, France and Spain had an ascertainent rate of about 0.10.
Some towns already give per capita rates. However, these are usually total cases, not active cases. One assumption you could make is that half the cases have recovered.
Cases per 100K	out of	% active	Prevalance
607	100000	0.5	0.03035
